# Supplementary material for: Oleic Acid Exhibits Anti-Proliferative and Anti-Invasive Activities via the PTEN/AKT/mTOR Pathway in Endometrial Cancer
Source: MDPI journal article supplement (doi:10.3390/cancers15225407), 2023-11-14

**Figure S1: Effect of OA on the expression of proteins related to cellular stress, autophagy, and cell apoptosis in EC.**

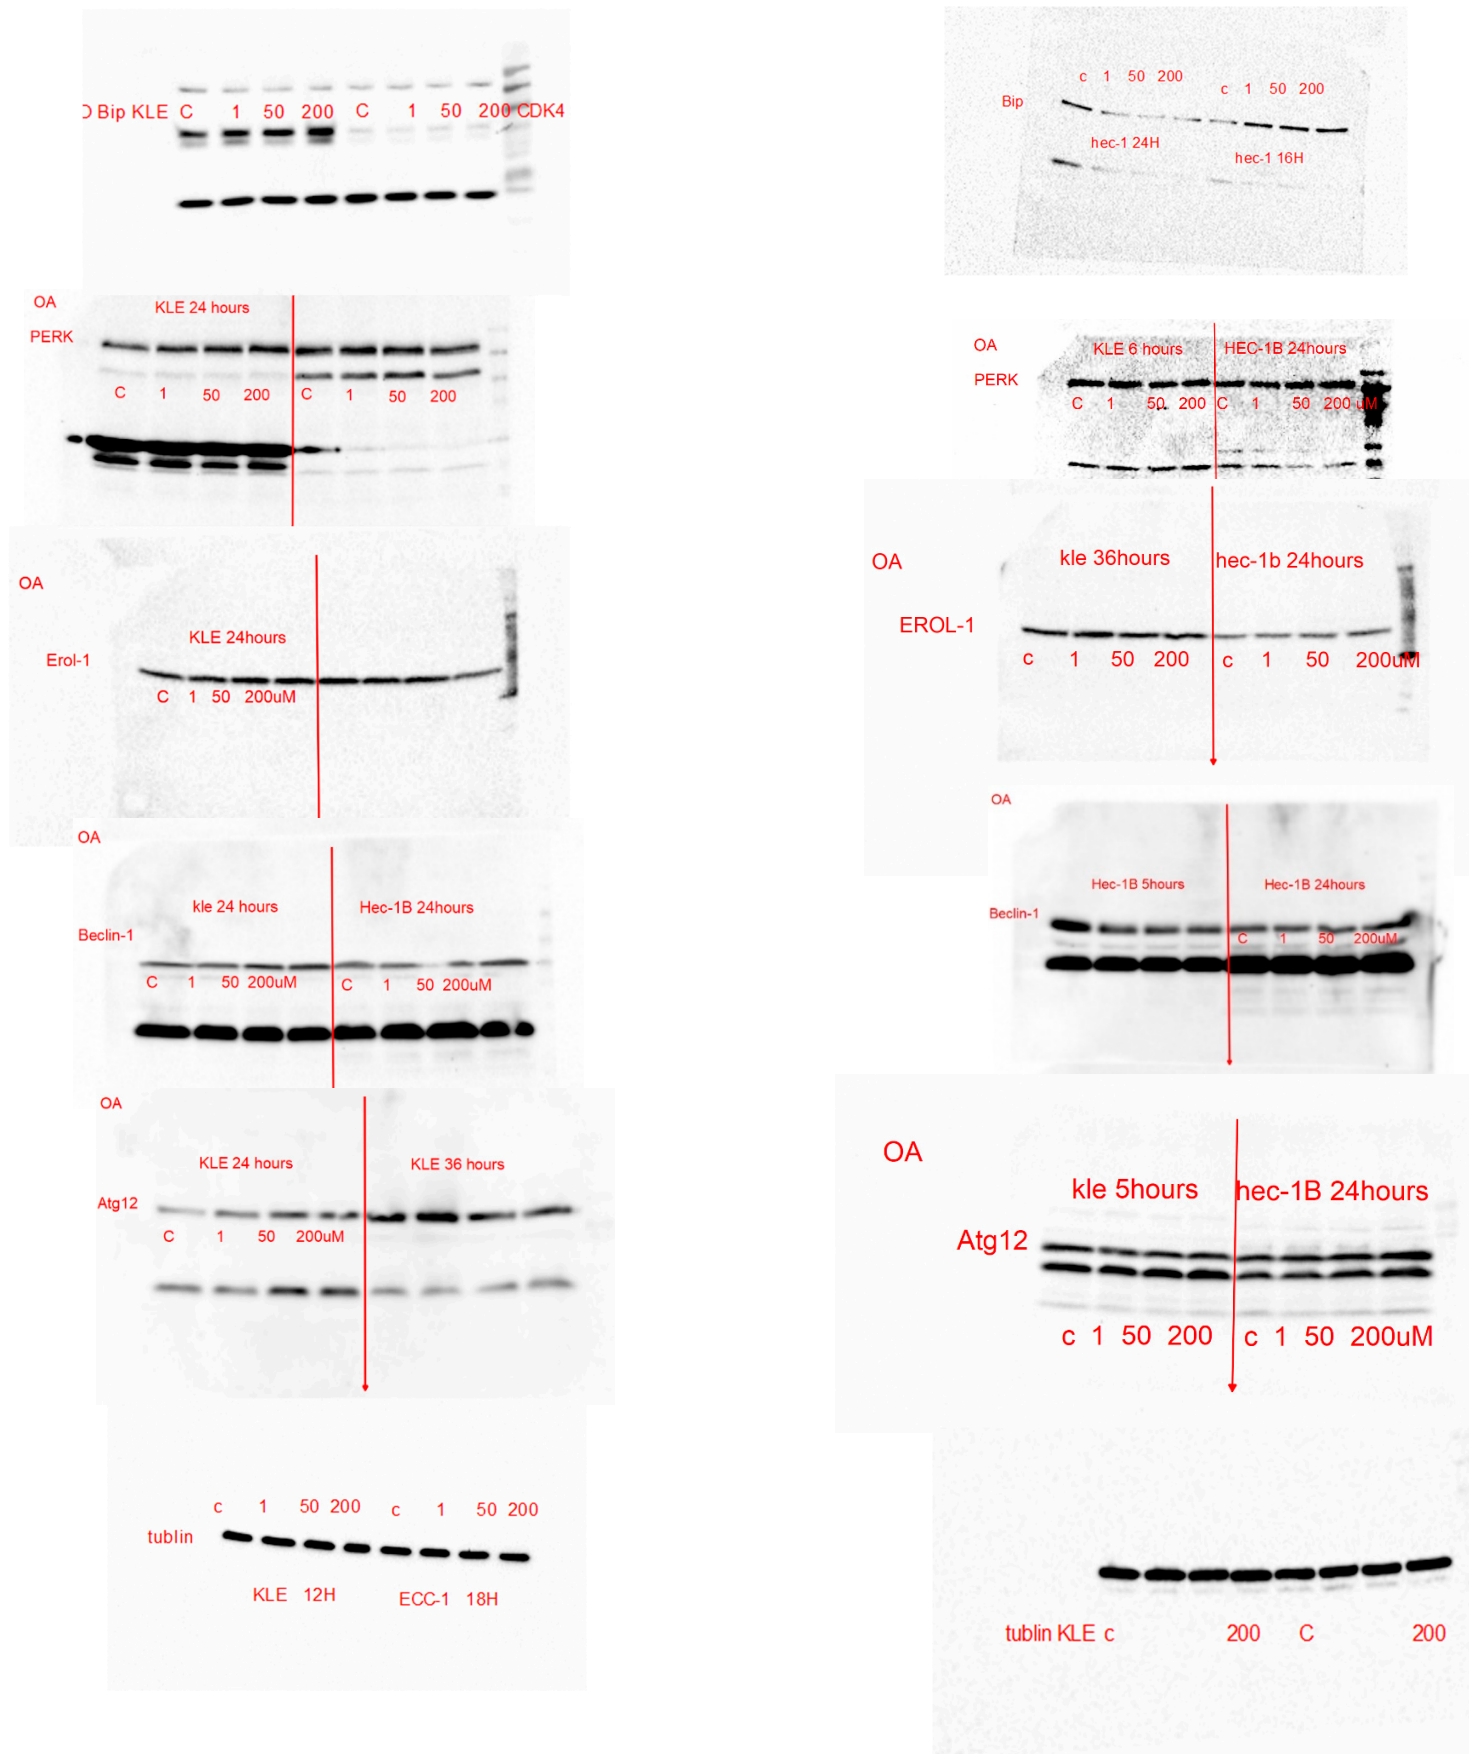

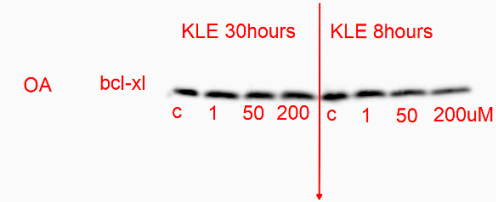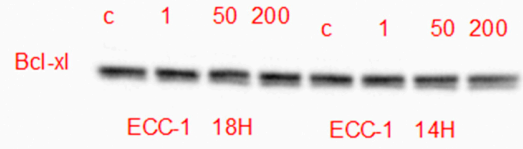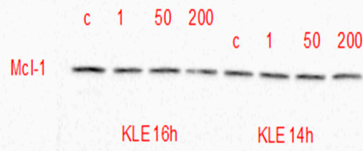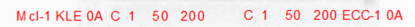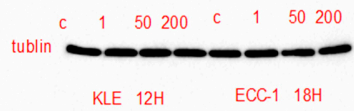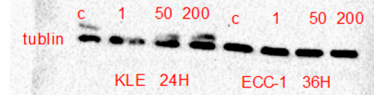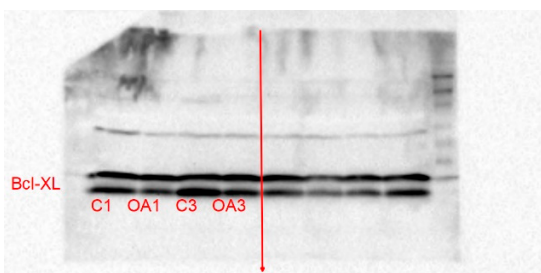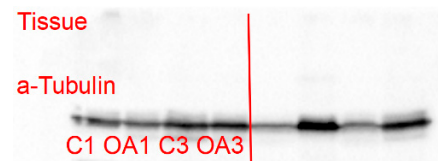

Figure S2: OA decreased the expression of proteins related to cell cycle in EC cells.

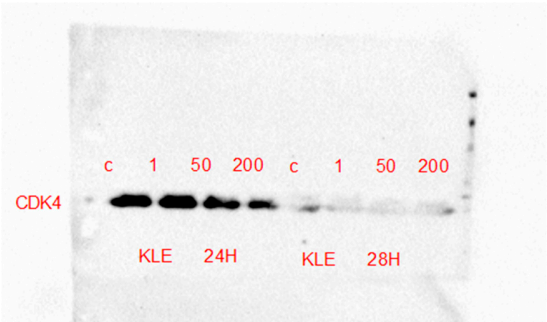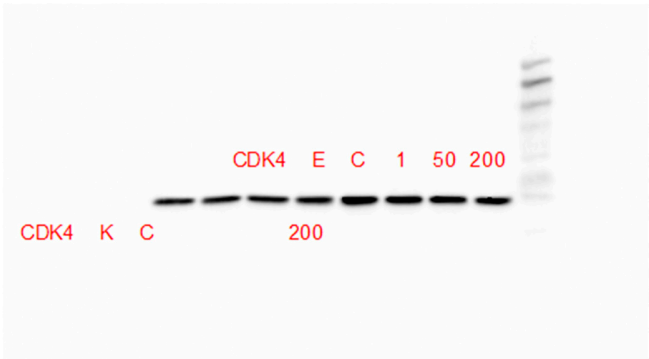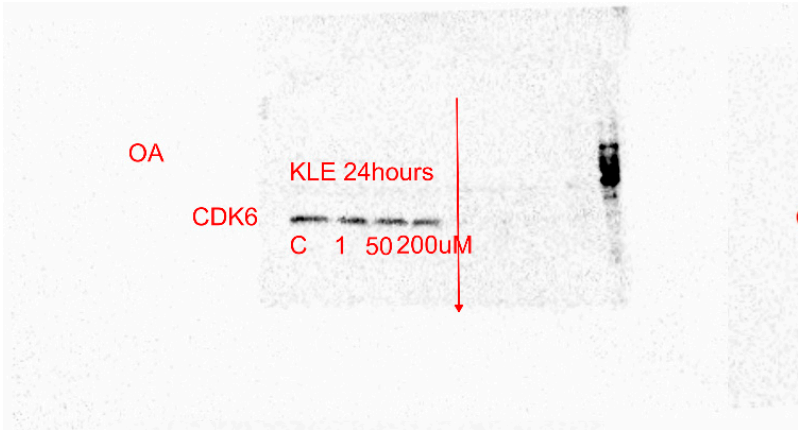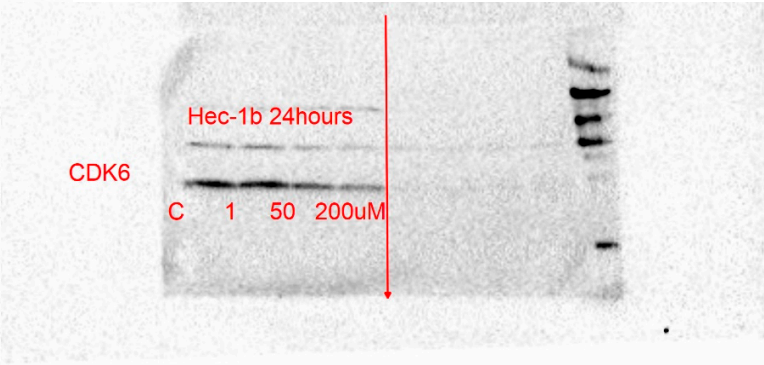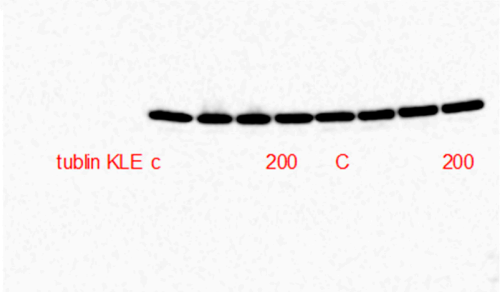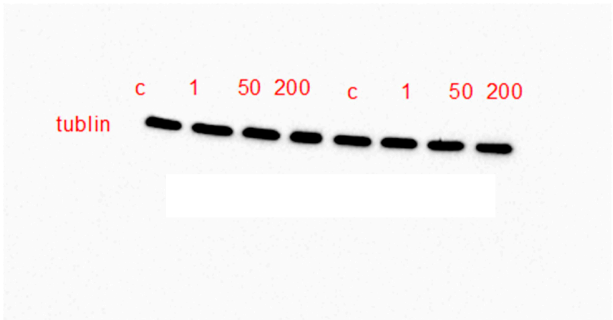

Figure S3: Effect of OA on the expression of proteins related to EMT in EC cells.

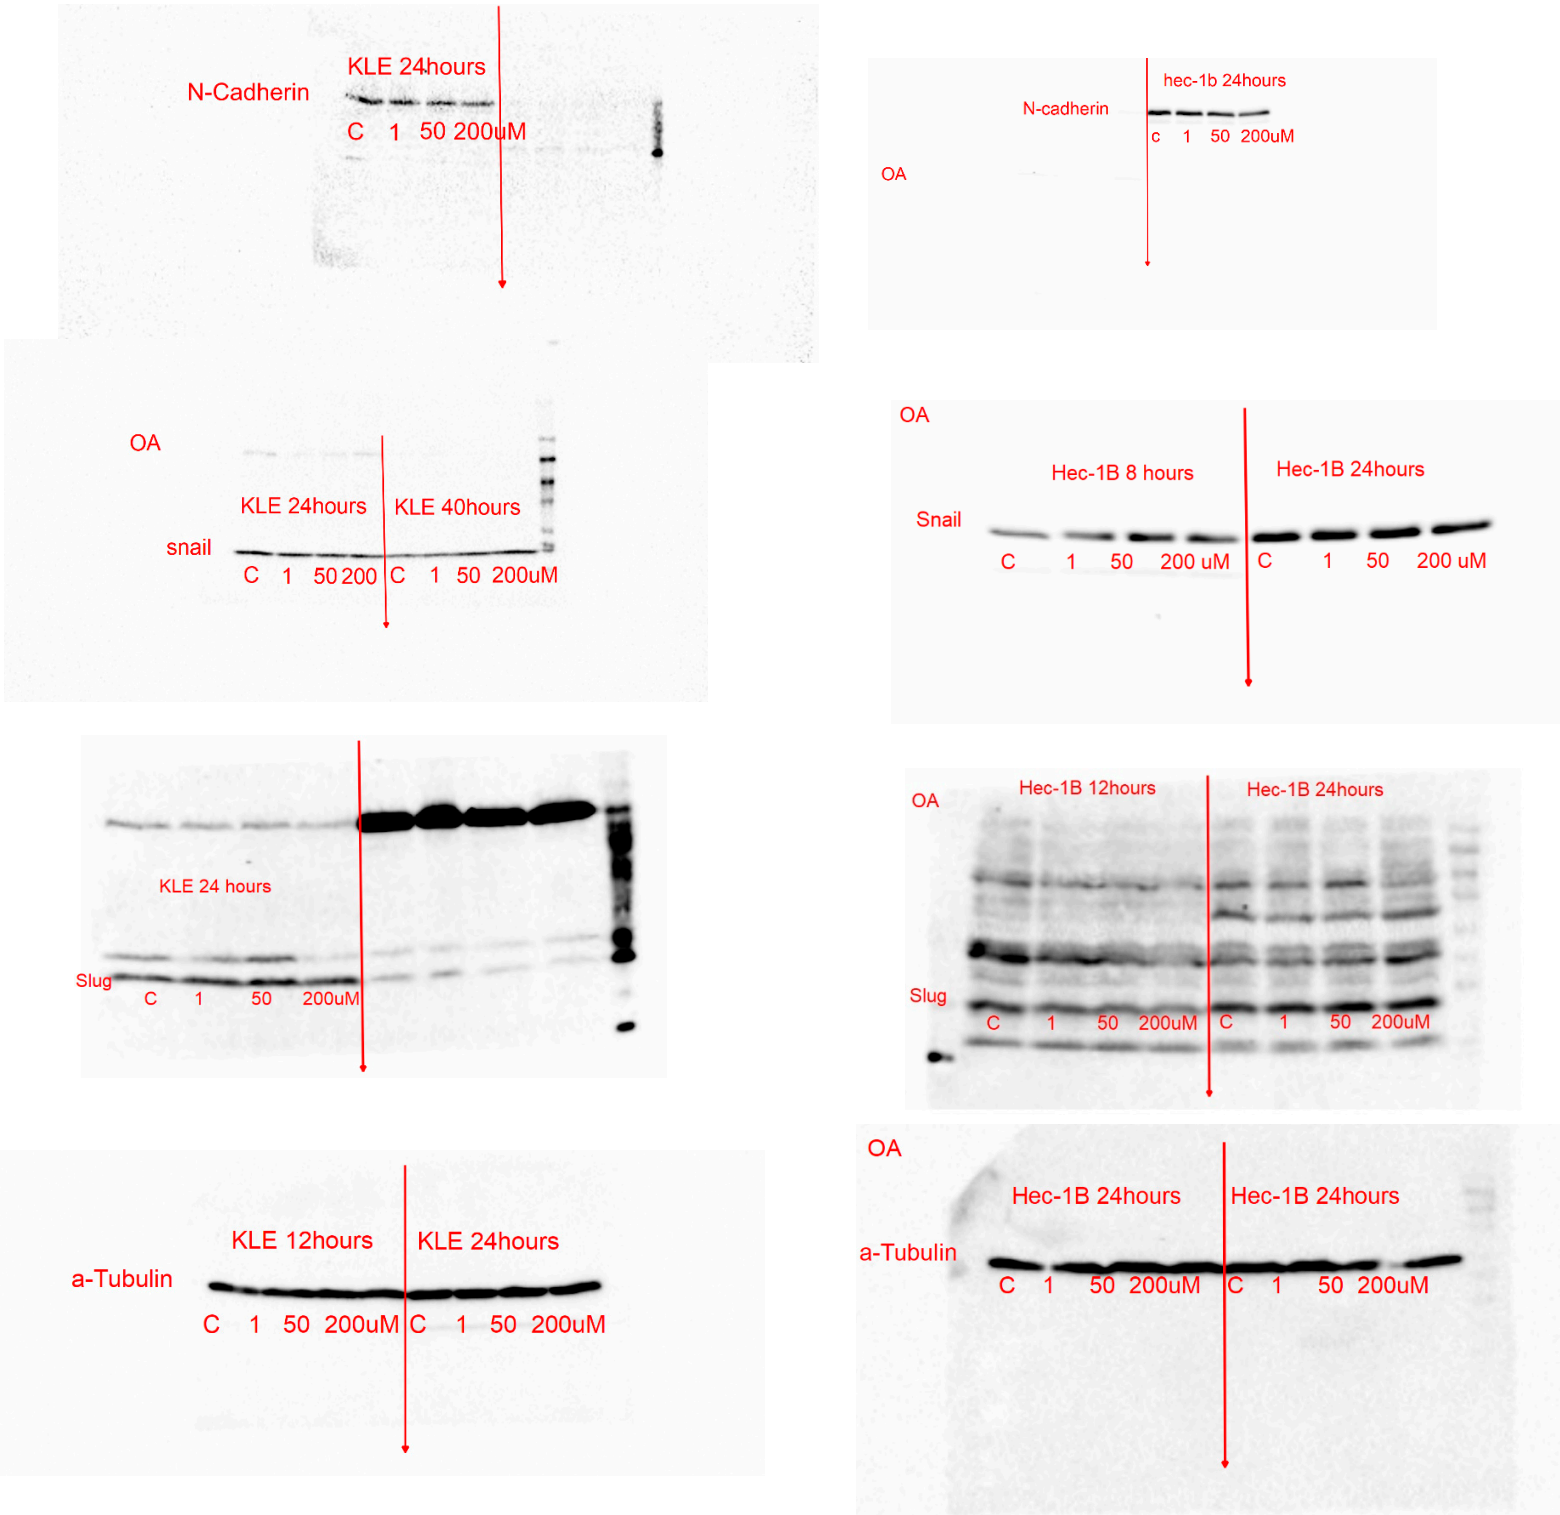



**Figure S4: Effect of OA on the expression of proteins related to fatty acid metabolism in EC cells.**

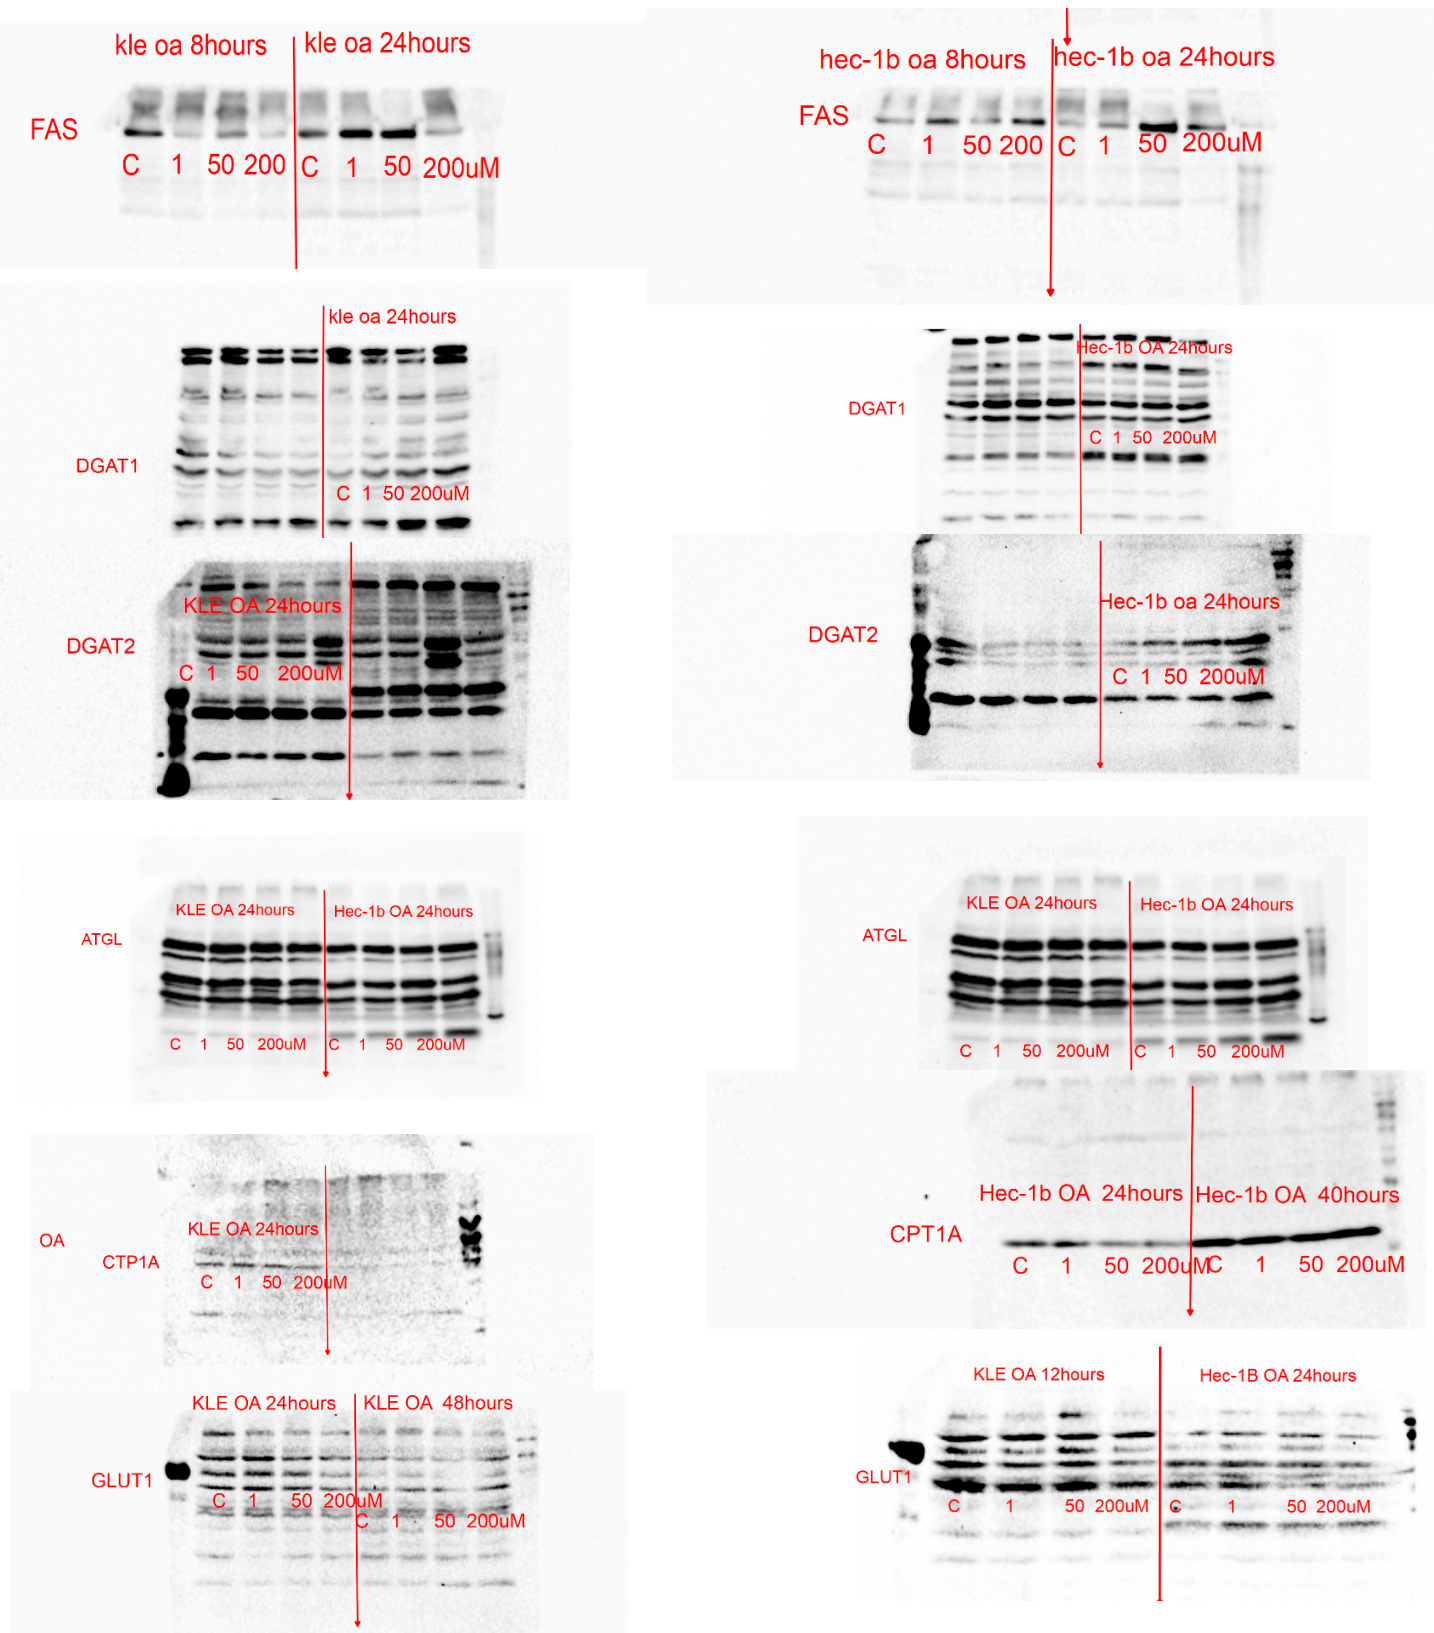

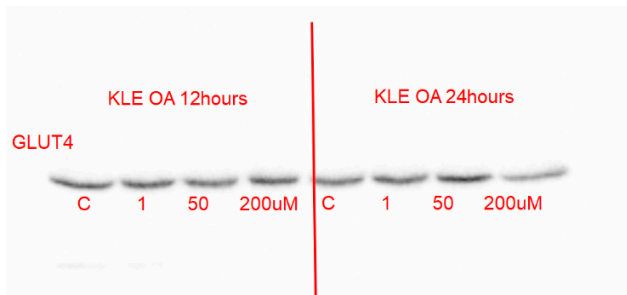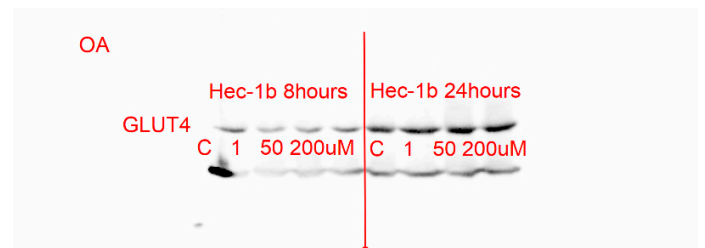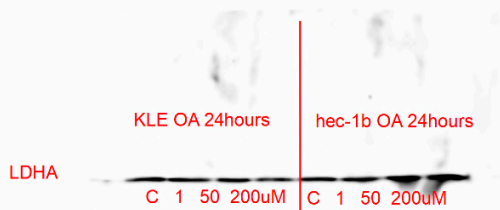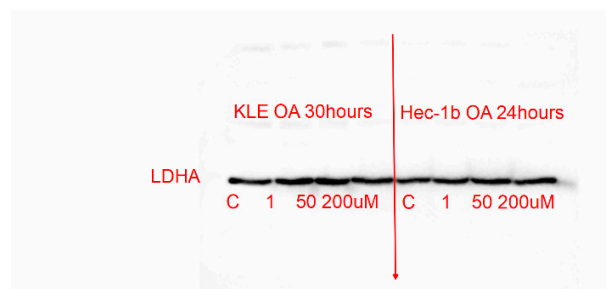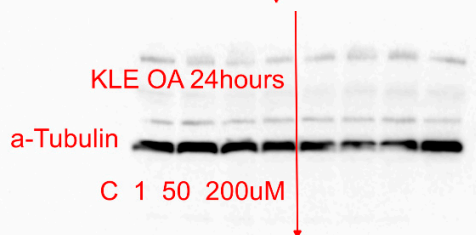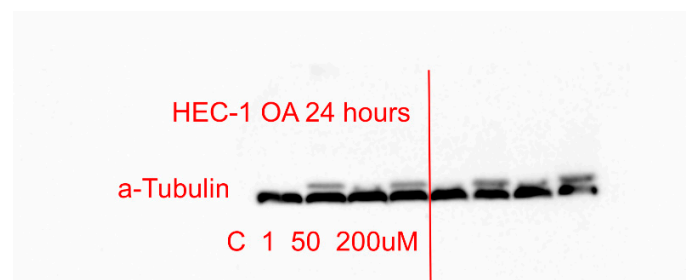

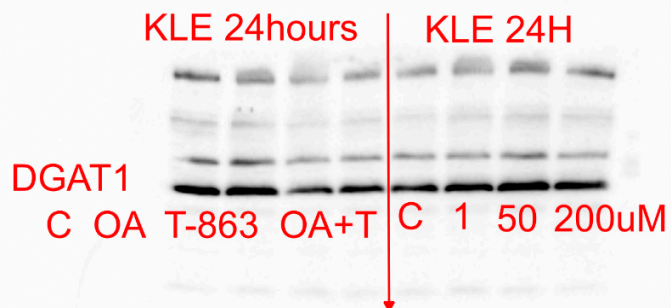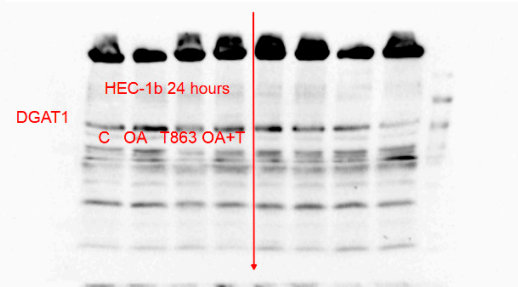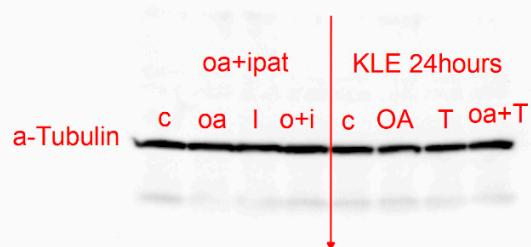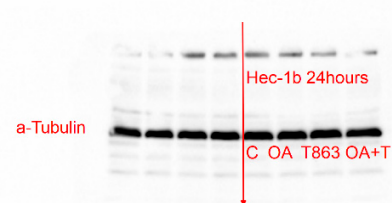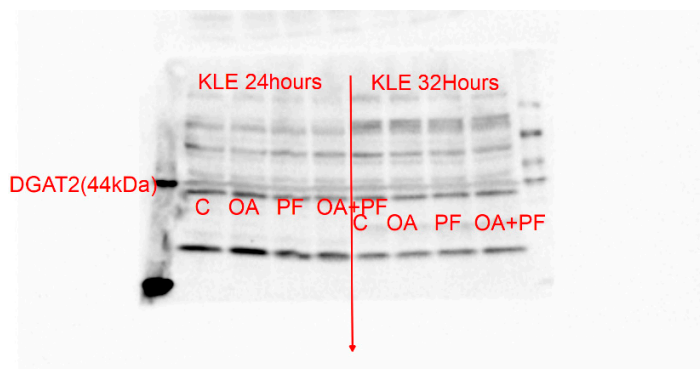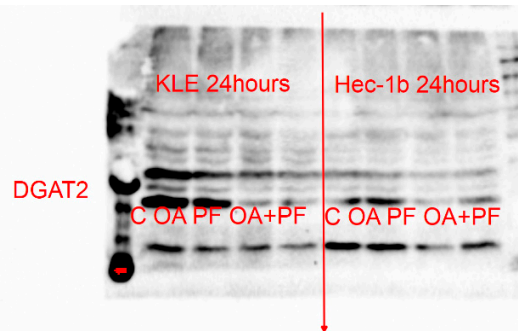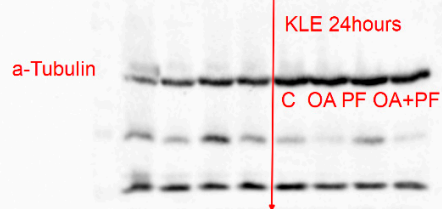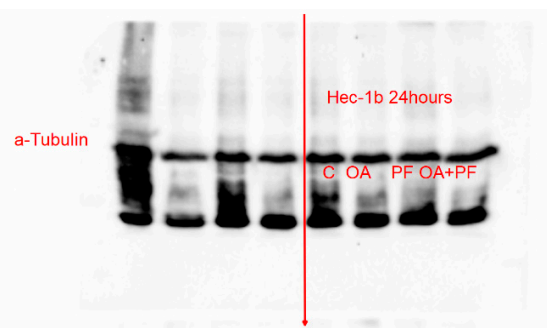

**Figure S5: Effect of OA on the expression of proteins related to PTEN/AKT/mTOR and MAPK pathways in EC cells.**

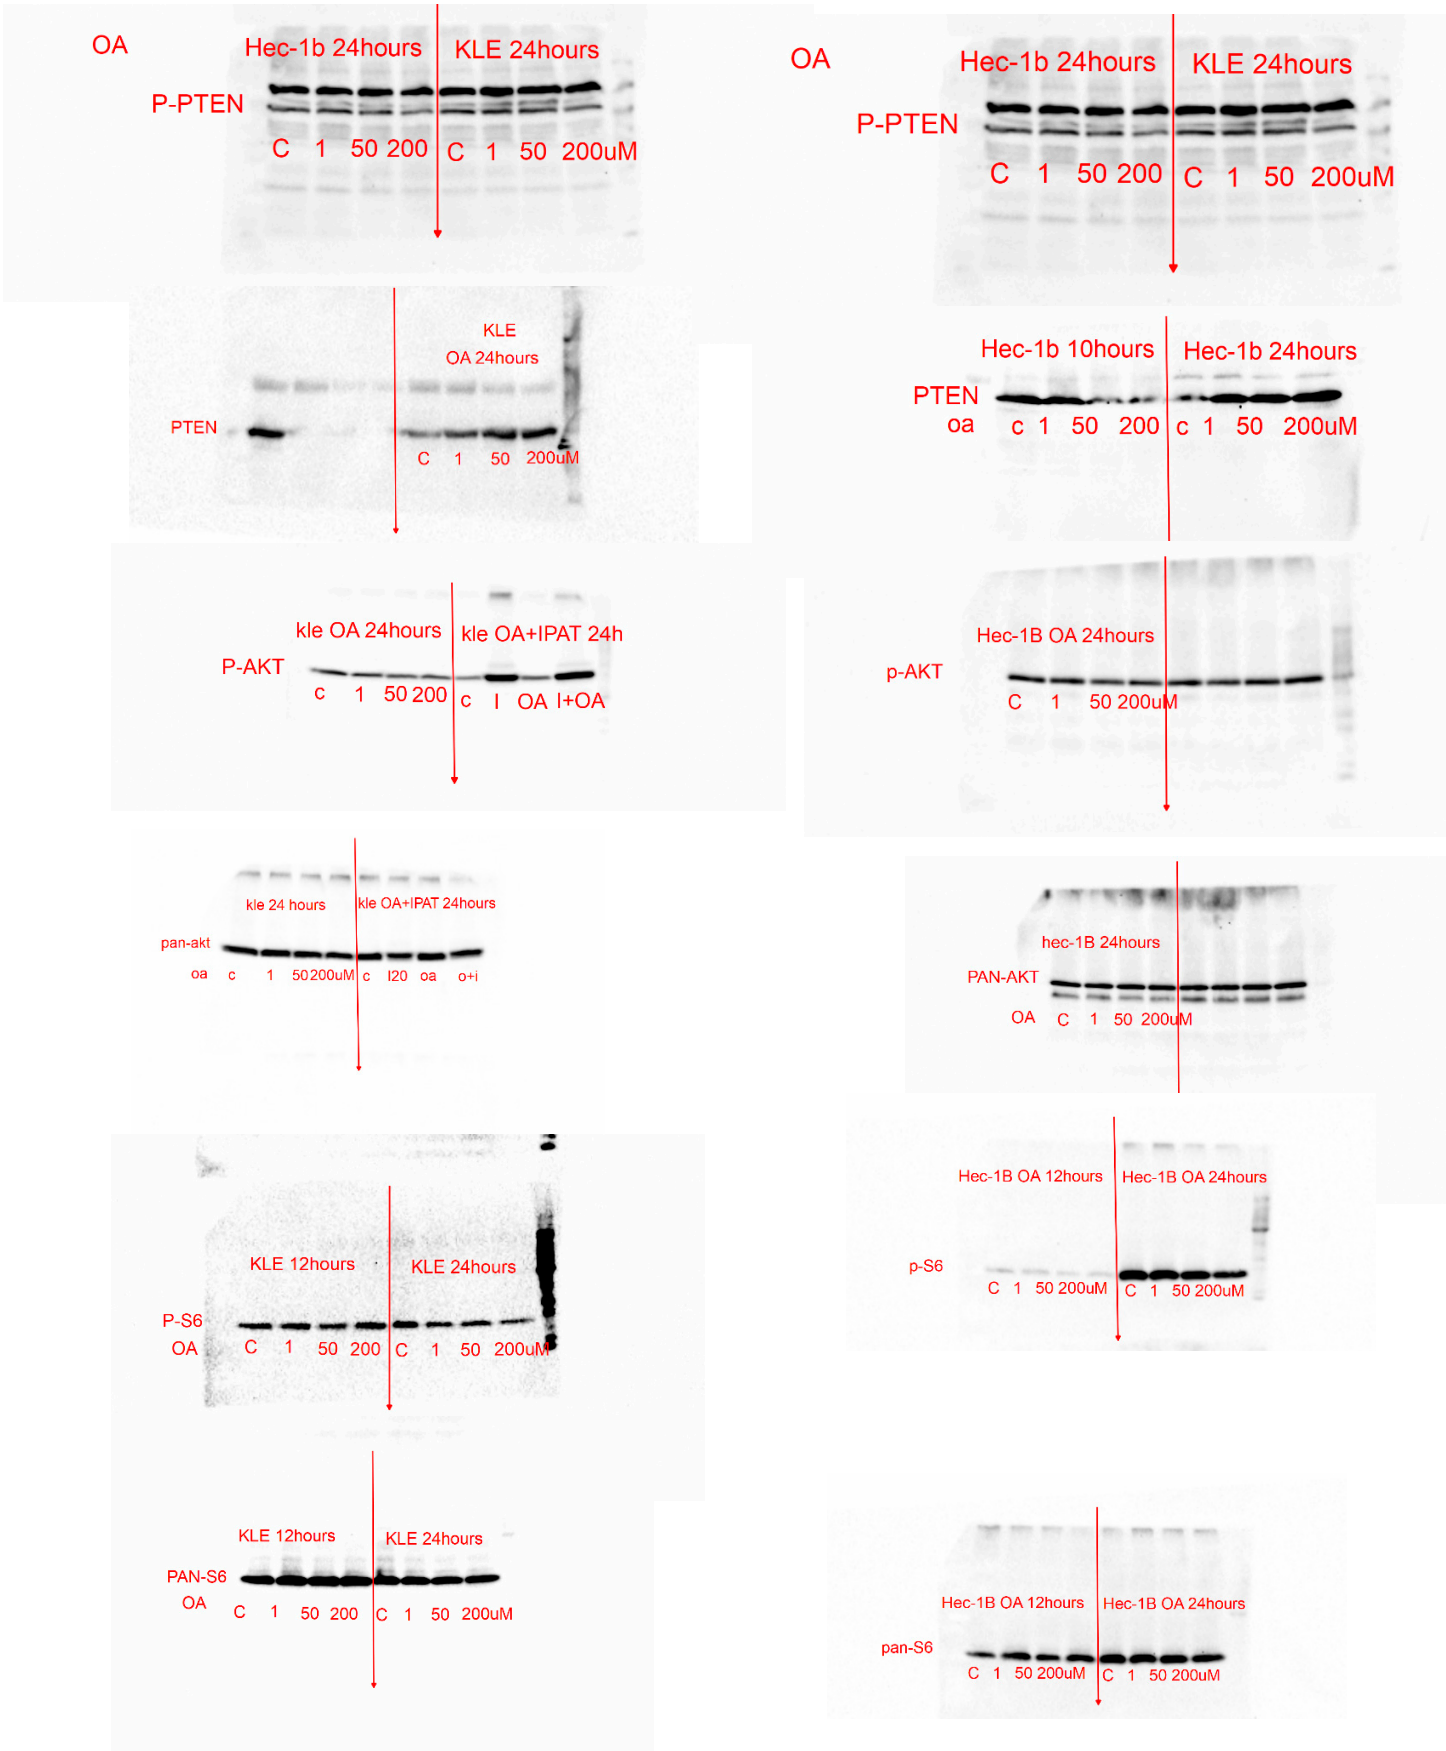



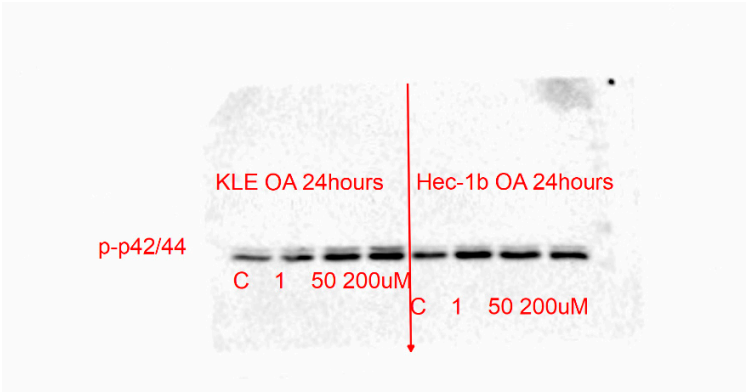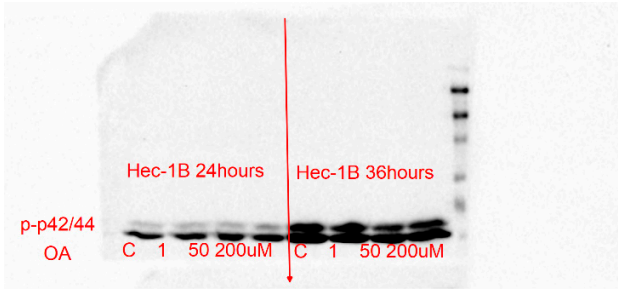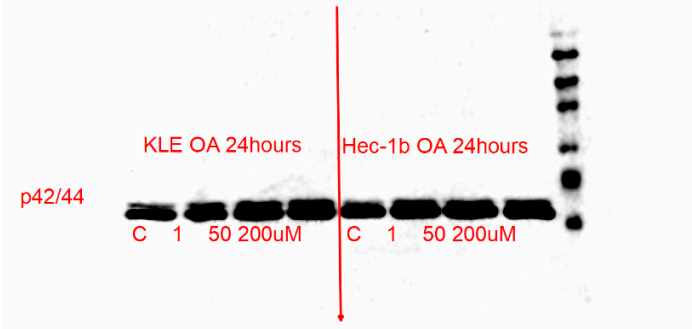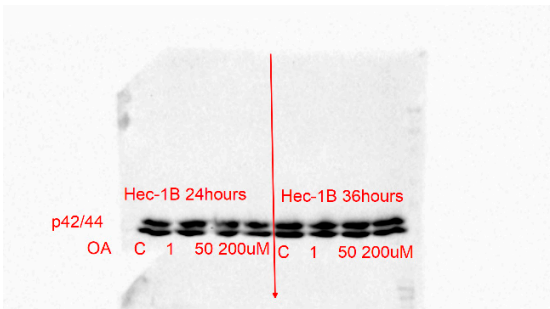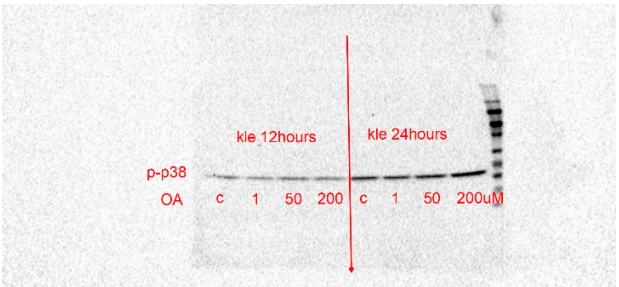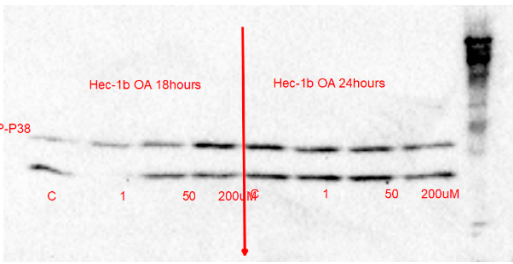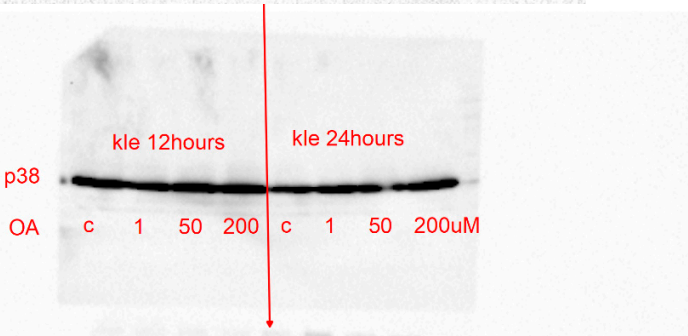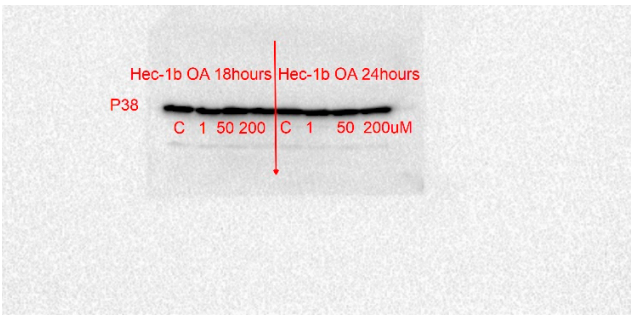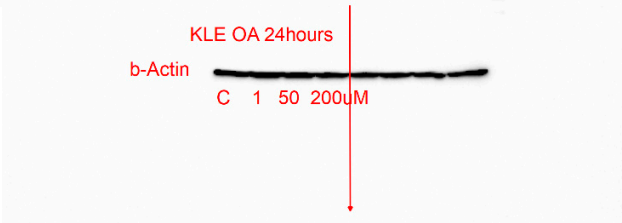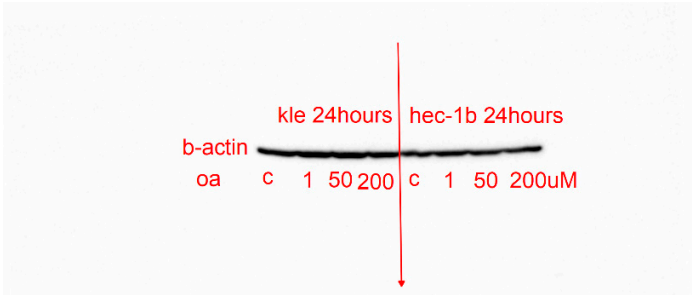

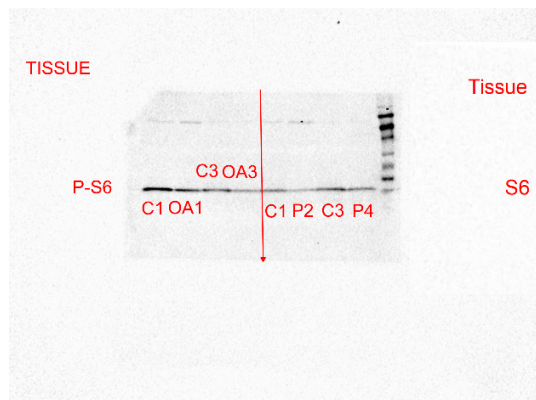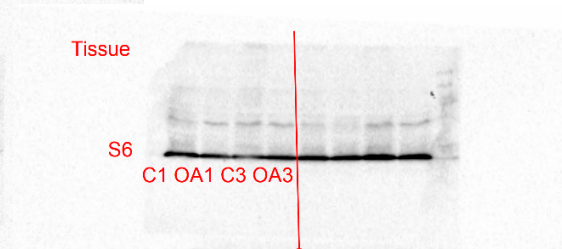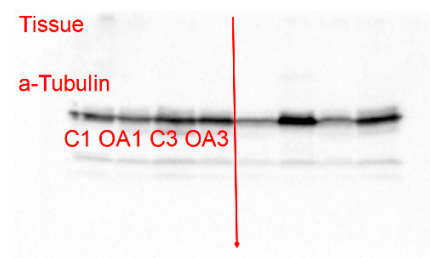

**Figure S6: PTEN knockdown led to the change of protein expression in HEC-1B cells and partially reversed the inhibitory effects of OA on the related protein expression.**

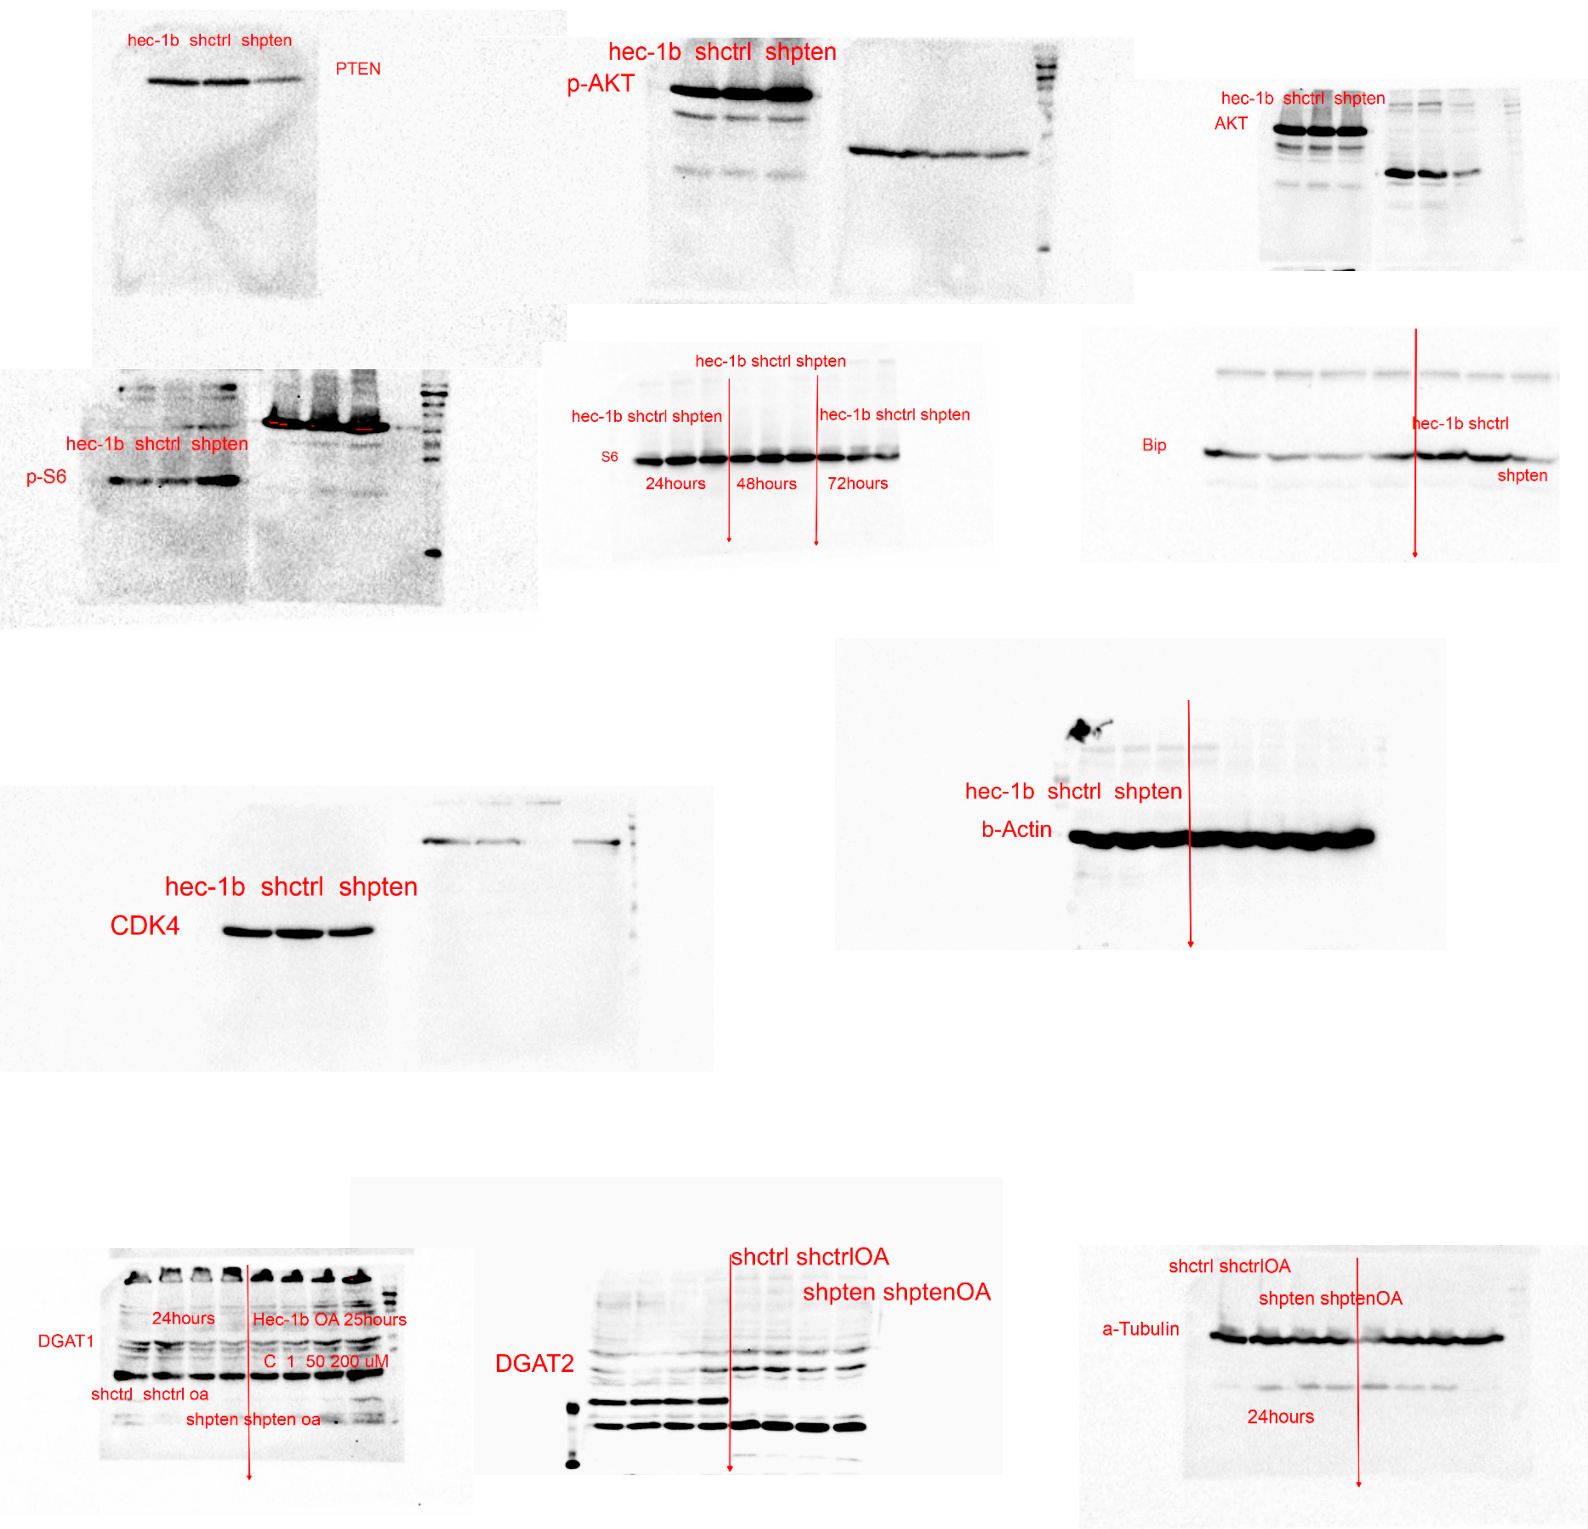

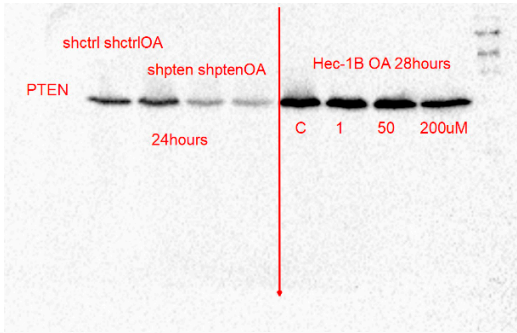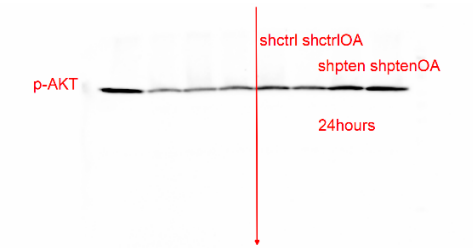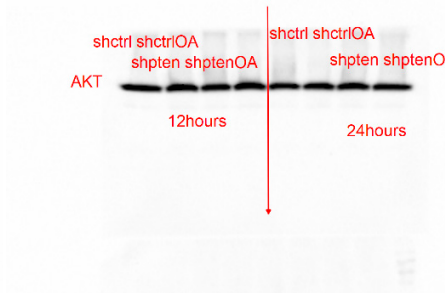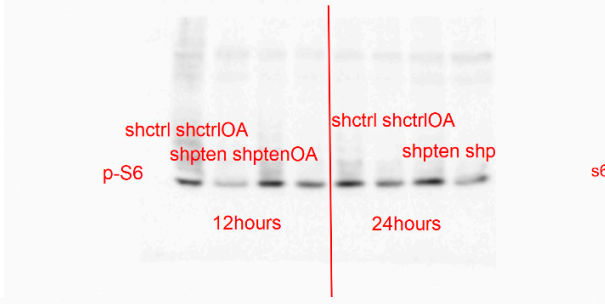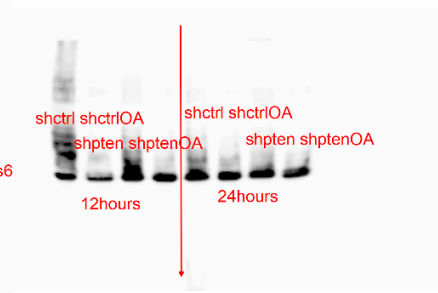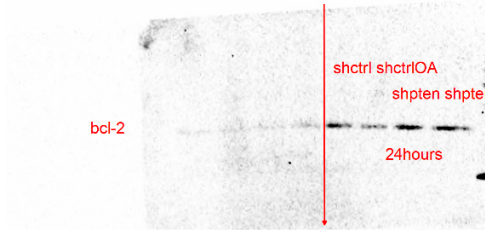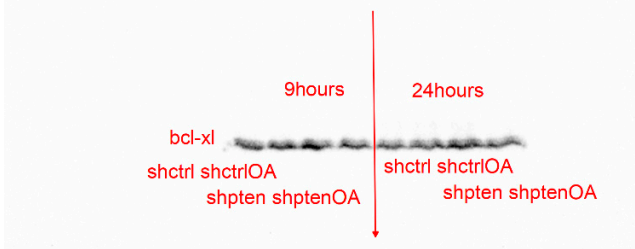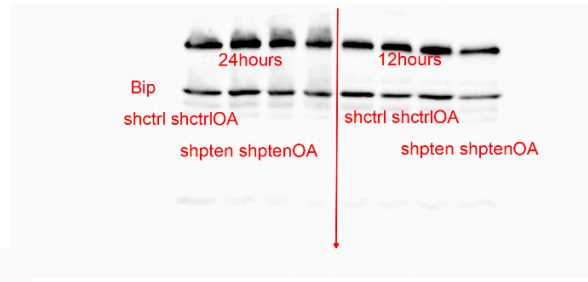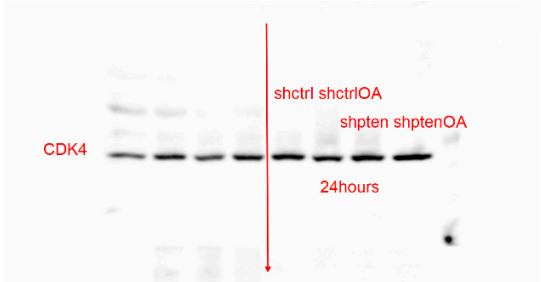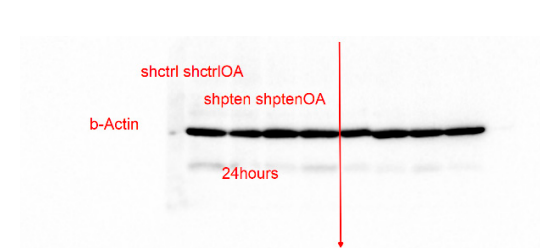



**Figure S7: The combination of IPAT and OA showed the greatest effects on the expression of related protein than either agent alone.**

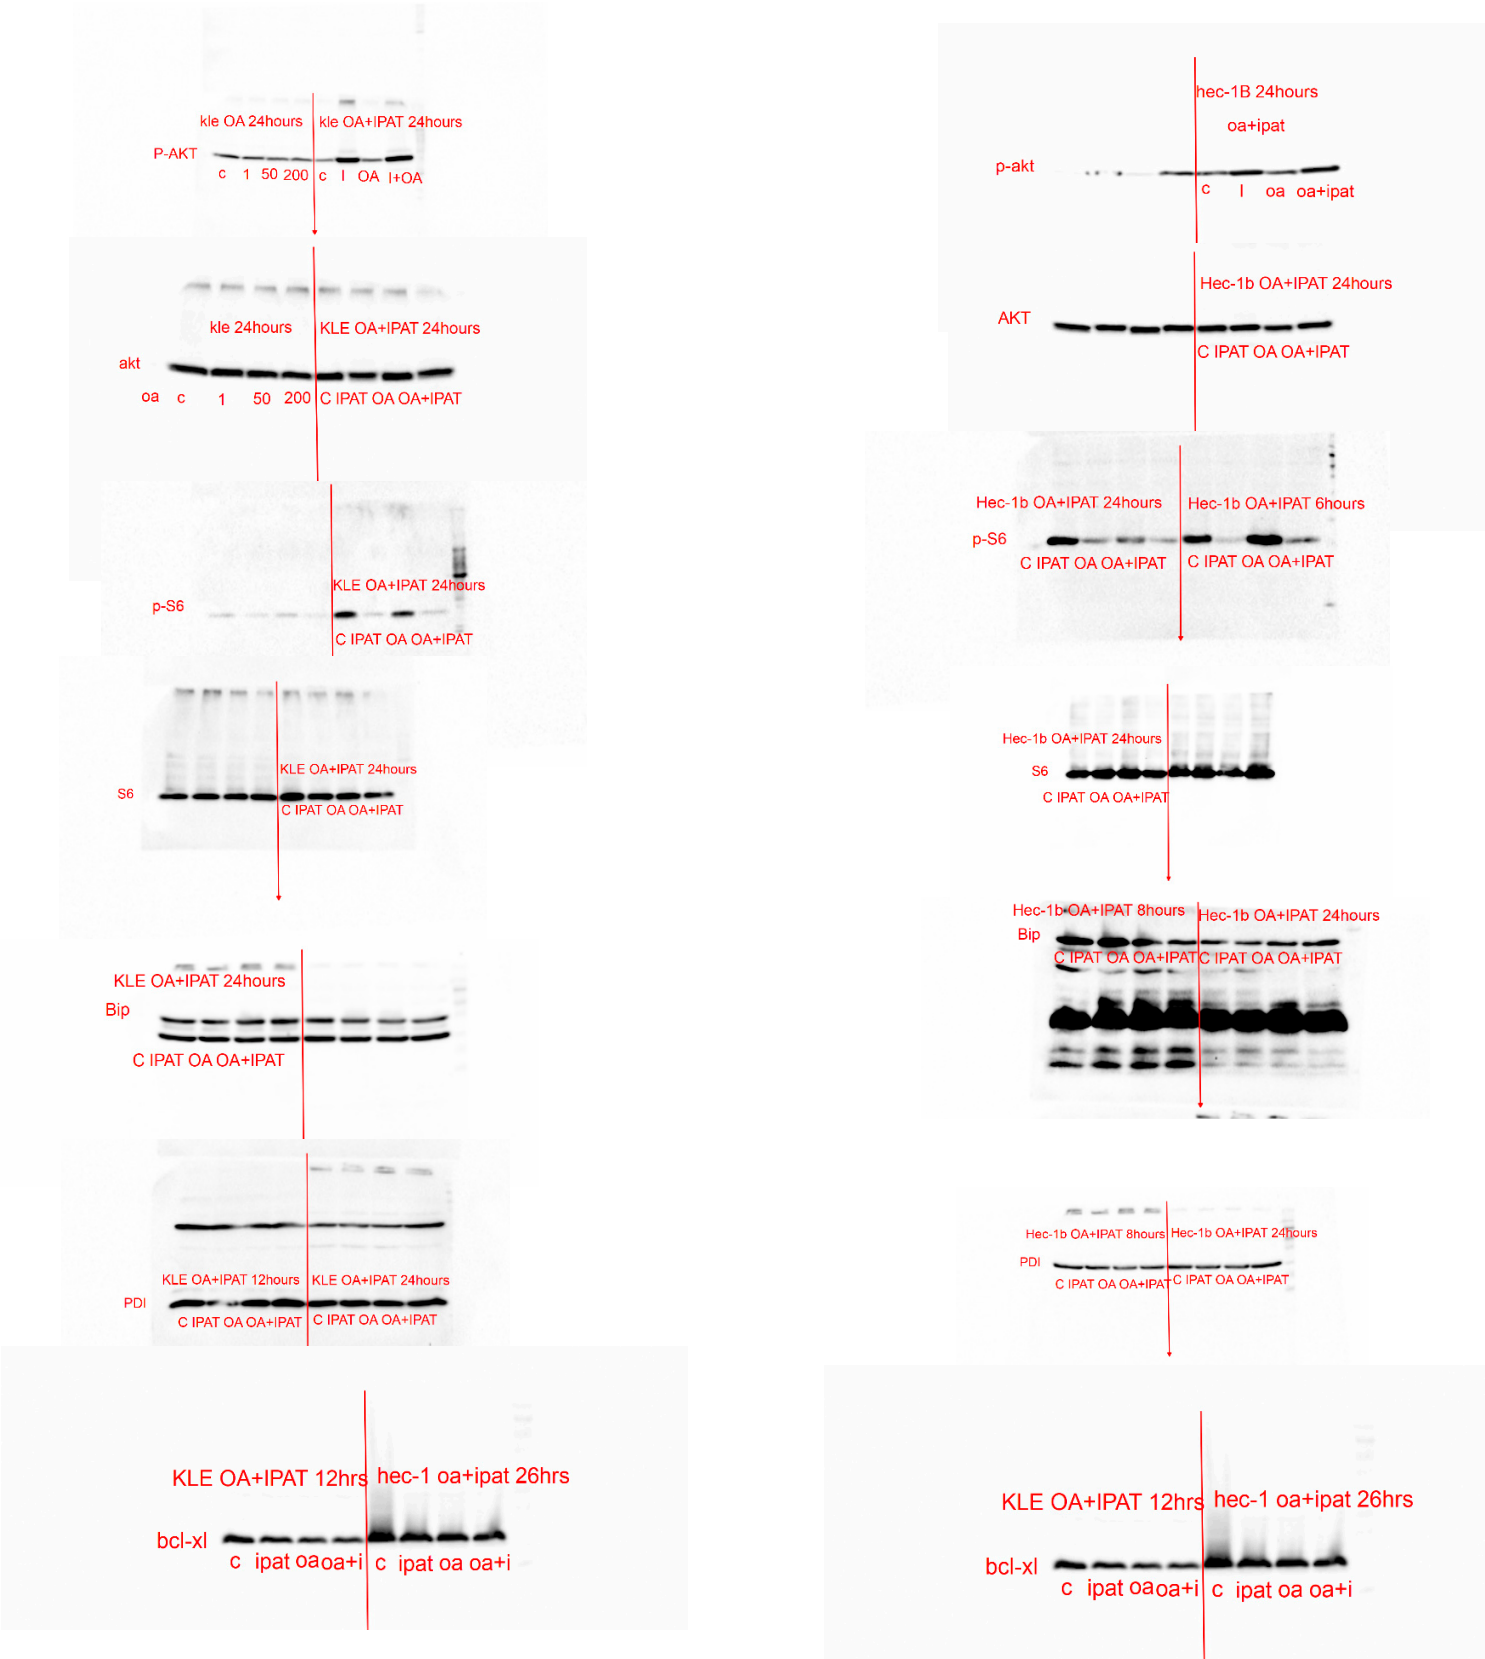



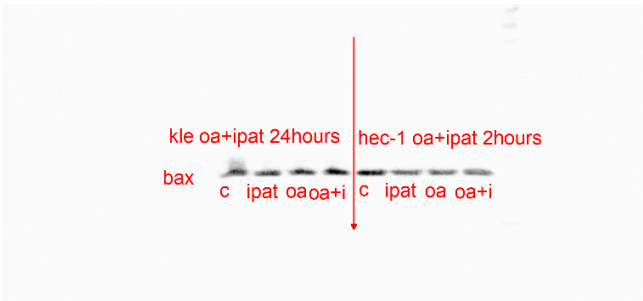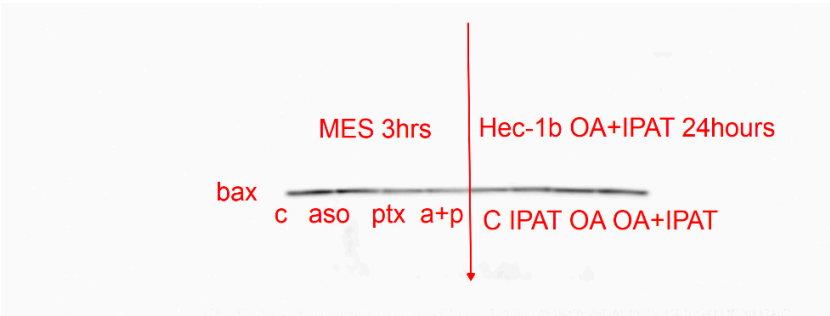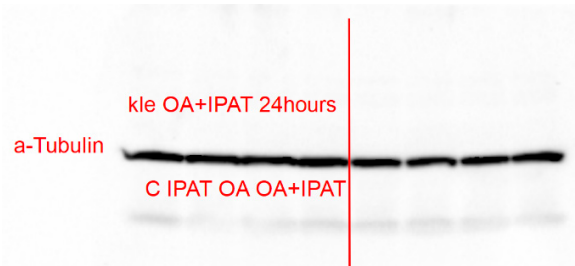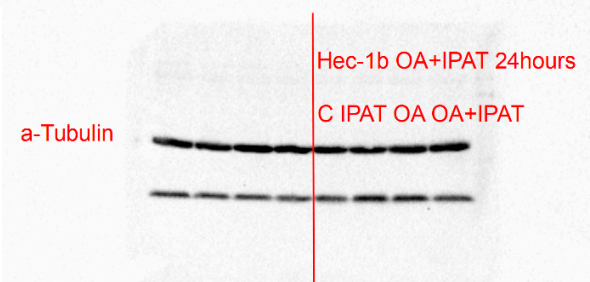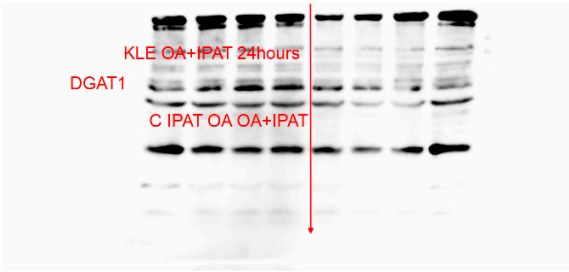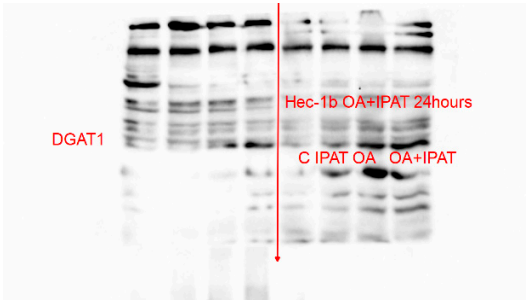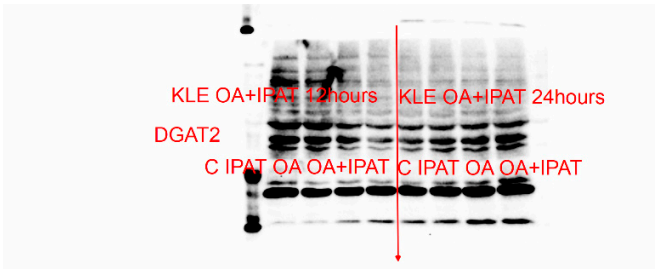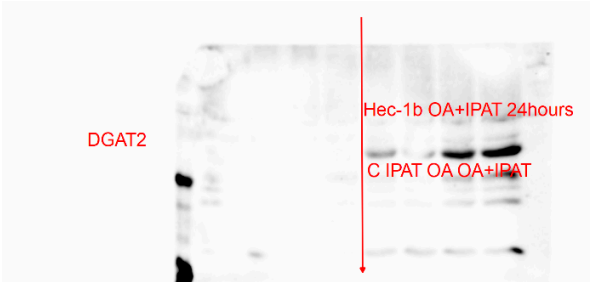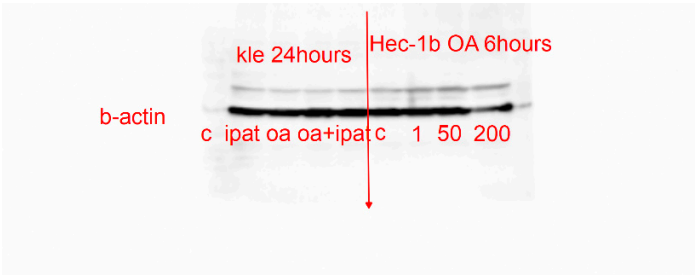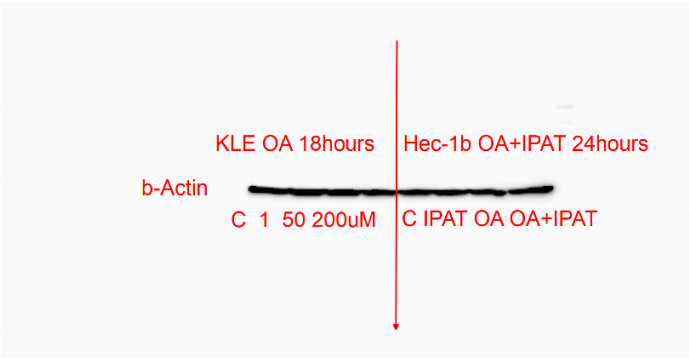

**Figure S8: OA inhibited the expression of proteins related to EMT via PTEN/AKT/S6 pathways in EC cells.**

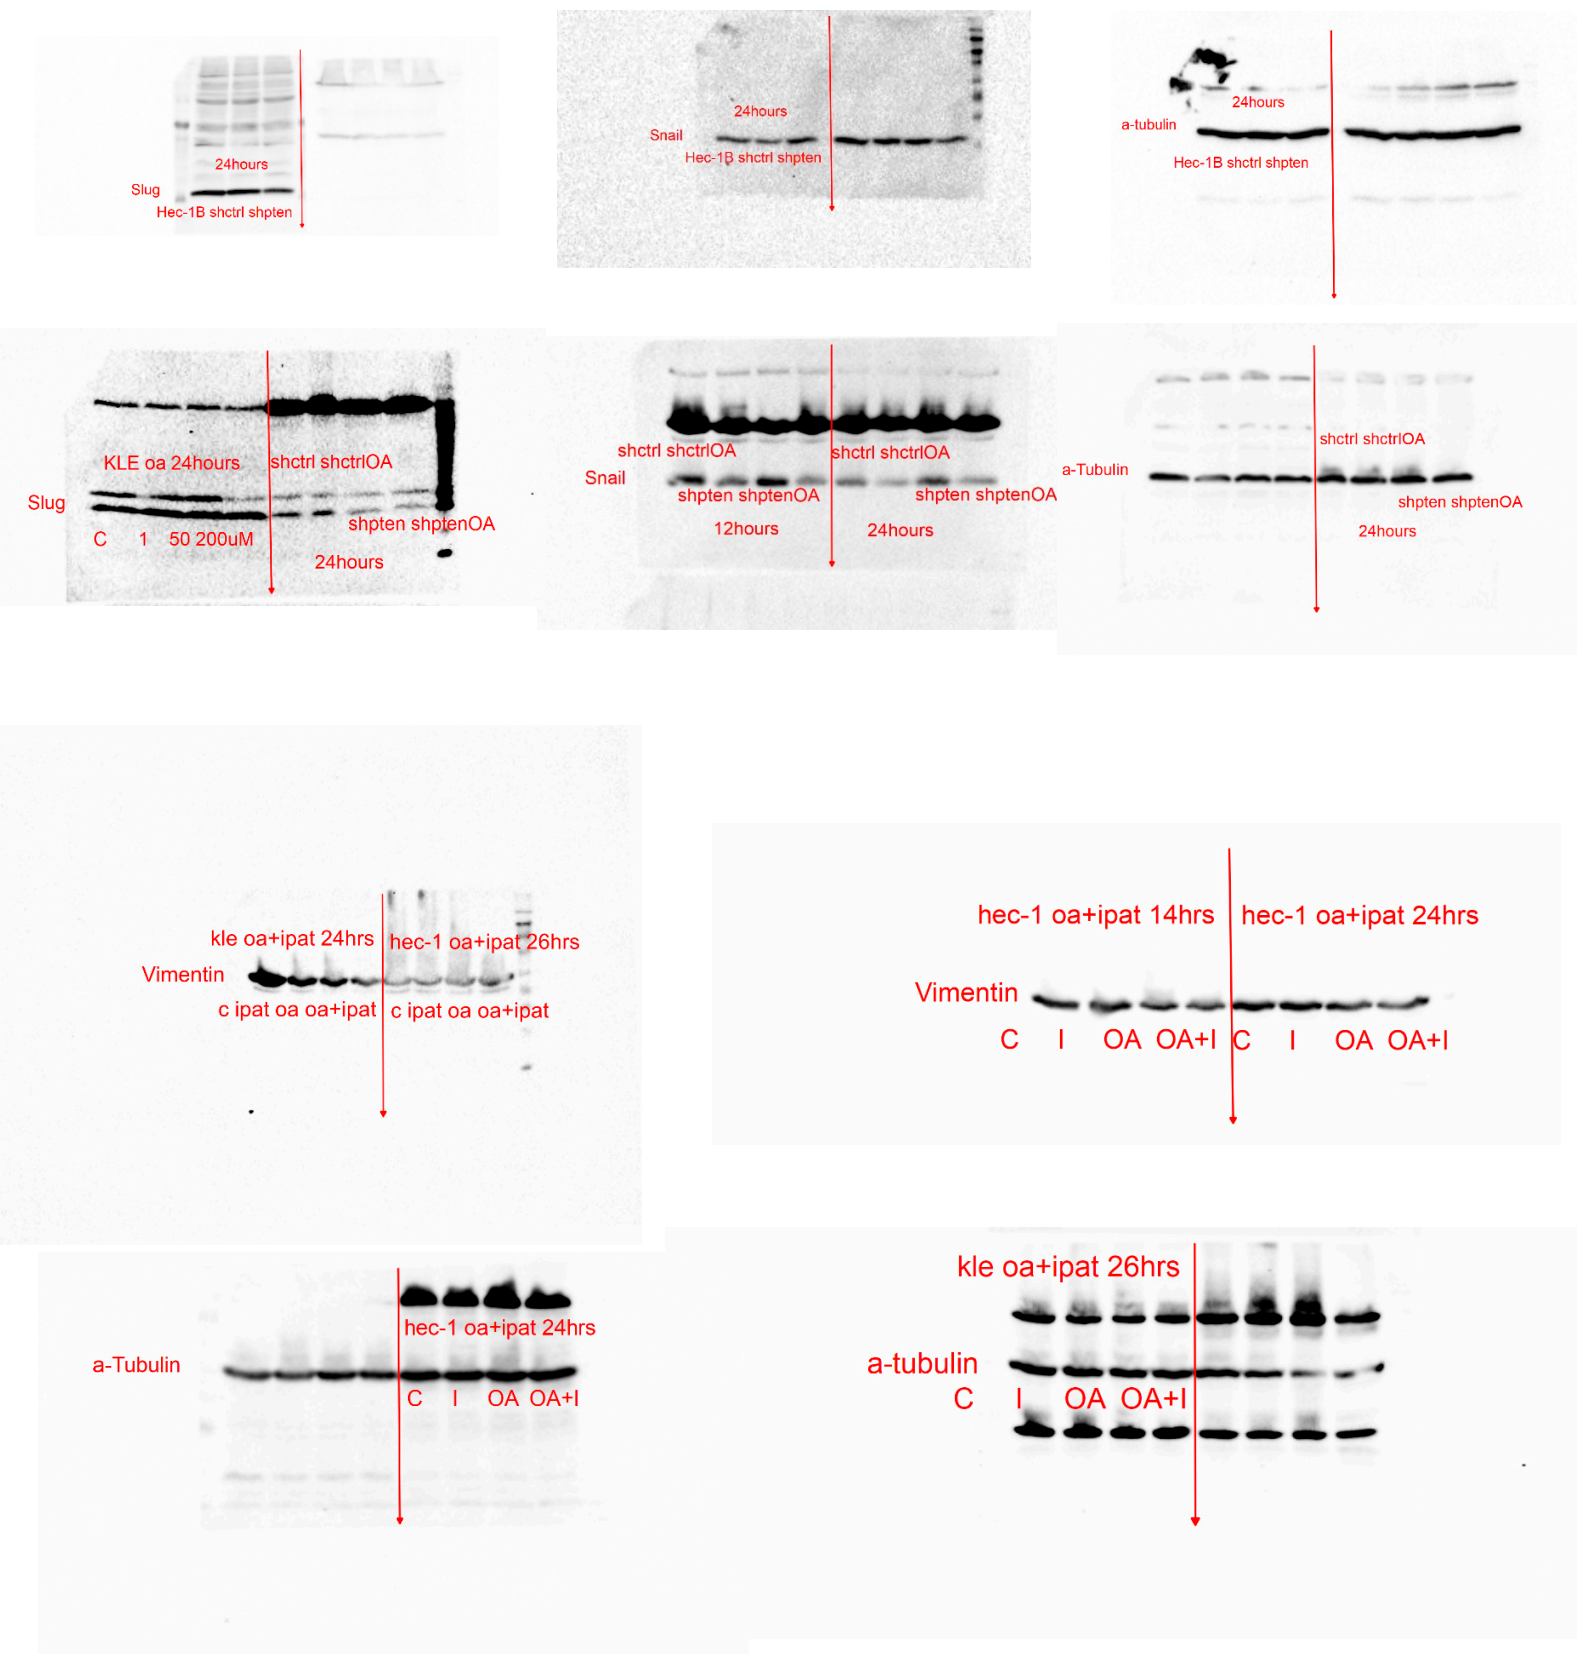

Supplement: s1 [file s1]
